# Supplementary material for: Blue fluorogenic probes for cell plasma membranes fill the gap in multicolour imaging
Source: Royal Society of Chemistry journal article supplement (doi:10.1039/c4ra16225k), 2015-01-01
Supplement: c4ra16225k1.pdf [file c4ra16225k1.pdf]

## Supporting information

### Blue fluorogenic probes for cell plasma membranes fill the gap in multicolour imaging

Remy Kréder, Sule Oncul, Oleksandr A. Kucherak, Kyrylo A. Pyrshev, Eleonore Real, Yves Mély, Andrey S. Klymchenko

#### Synthesis of probes

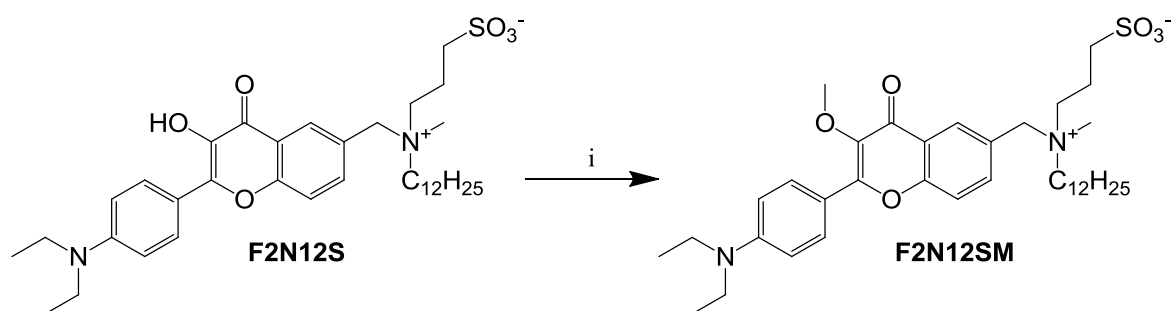

**Figure S1.** Synthesis scheme of the probe F2N12SM.

(i) MeI, K<sub>2</sub>CO<sub>3</sub>, MeOH, RT overnight (80%).

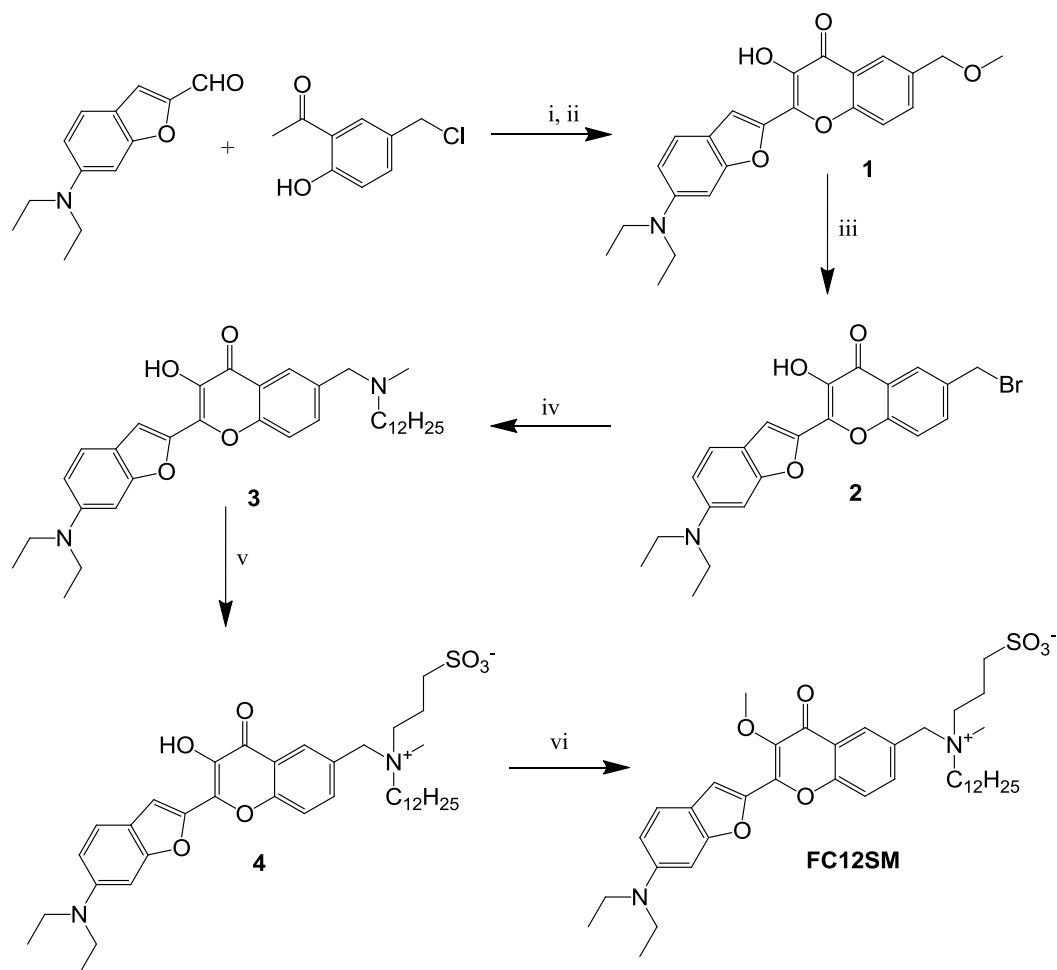

**Figure S2.** Synthesis scheme of the probe FC12SM.

(i) NaOMe, DMF, RT, 24h; (ii) NaOMe, EtOH, H<sub>2</sub>O<sub>2</sub>, reflux, 5 min (30% two steps); (iii) HBr 48%, 100 °C, 10 min (85%); (iv) THF, N-methyldodecylamine, RT, 2h (25%); (v) 1,3-propanesultone, CH<sub>3</sub>CN, 100°C, 24h (33%), (vi) MeI, K<sub>2</sub>CO<sub>3</sub>, MeOH, RT overnight (85%).

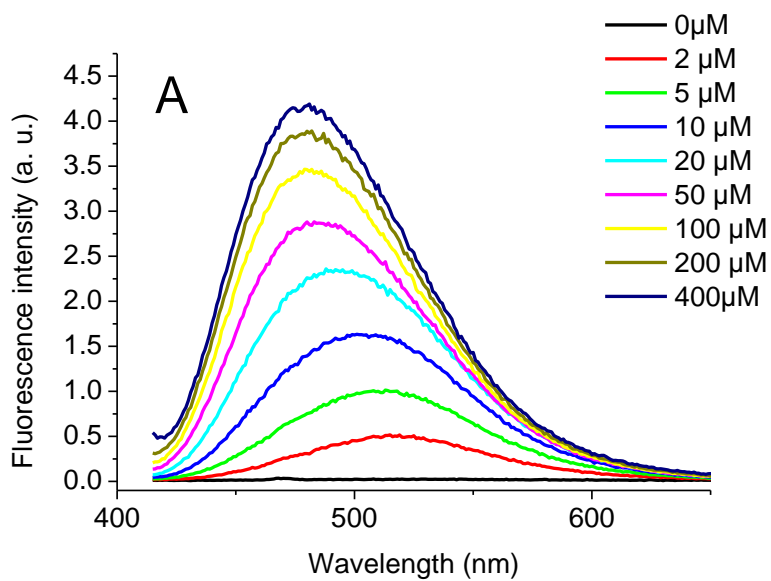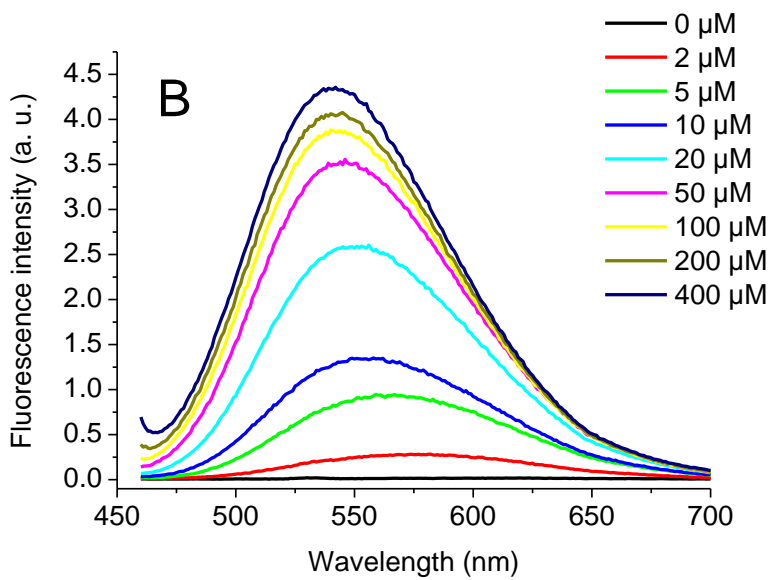

**Figure S3.** Fluorescence spectra of F2N12SM and FC12SM probes (200  $\mu\text{M}$ ) in the presence of lipid vesicles at different lipid (DOPC) concentrations.

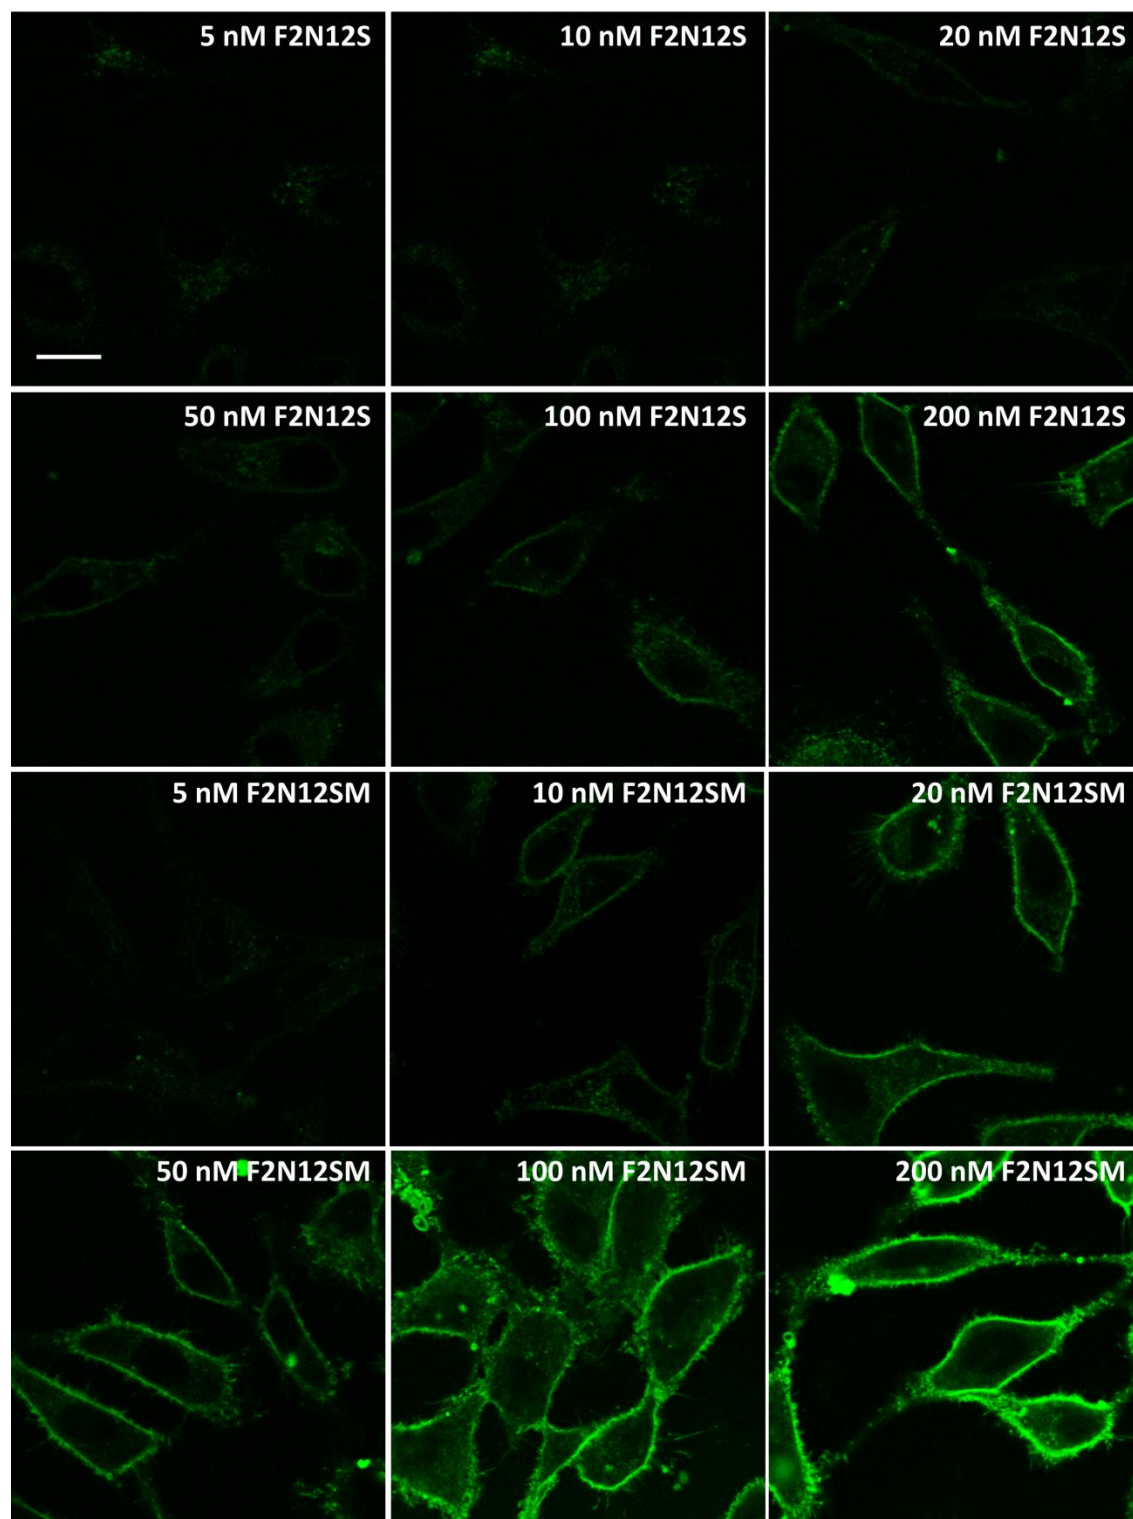

**Figure S4.** Fluorescence confocal images of HeLa cells stained with different concentrations of F2N12S or F2N12SM in Opti-MEM. Laser excitation wavelength was 405 nm. The emission was detected between 450 and 630 nm. Scale bar is 20  $\mu\text{m}$ .
